# Supplementary material
Source: Springer Nature journal article supplement (https://www.springermedizin.de/resource/supplementary/12885_2011_2890_MOESM1_ESM.pdf/9462244)

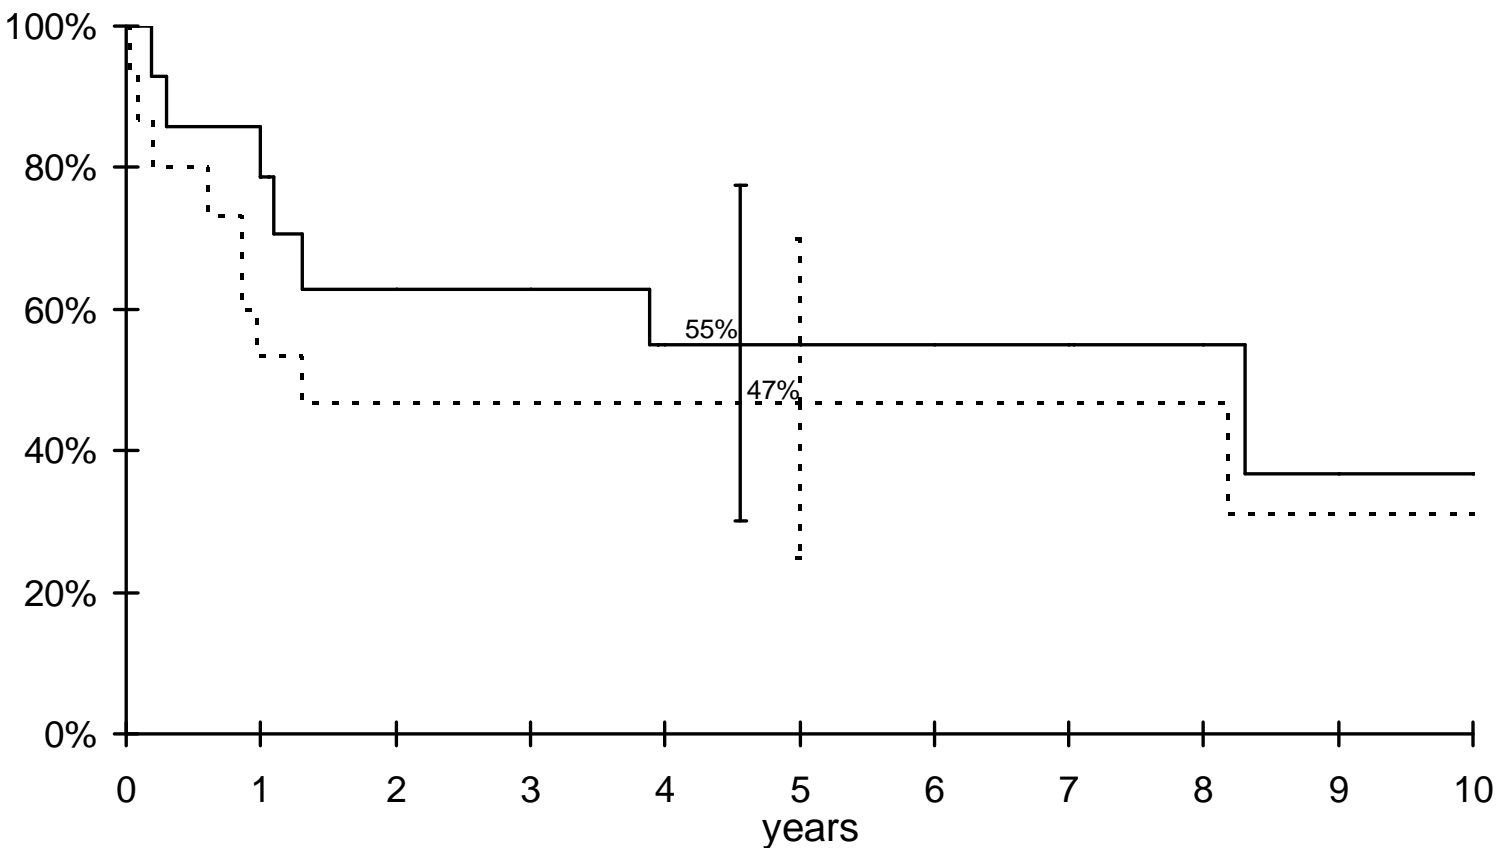

**At risk**

|       |    |    |   |   |   |   |   |   |   |   |   |
|-------|----|----|---|---|---|---|---|---|---|---|---|
| —     | 15 | 11 | 8 | 8 | 5 | 4 | 4 | 4 | 3 | 2 | 2 |
| - - - | 15 | 8  | 7 | 7 | 5 | 4 | 4 | 4 | 3 | 2 | 2 |

Supplement: MOESM1 [file 9462244]
